# Supplementary material for: Characterization of the Complete Mitochondrial Genome of Eight Diurnal Hawkmoths (Lepidoptera: Sphingidae): New Insights into the Origin and Evolution of Diurnalism in Sphingids
Source: MDPI journal article supplement (doi:10.3390/insects13100887), 2022-09-29
Supplement: s1 [file s1]

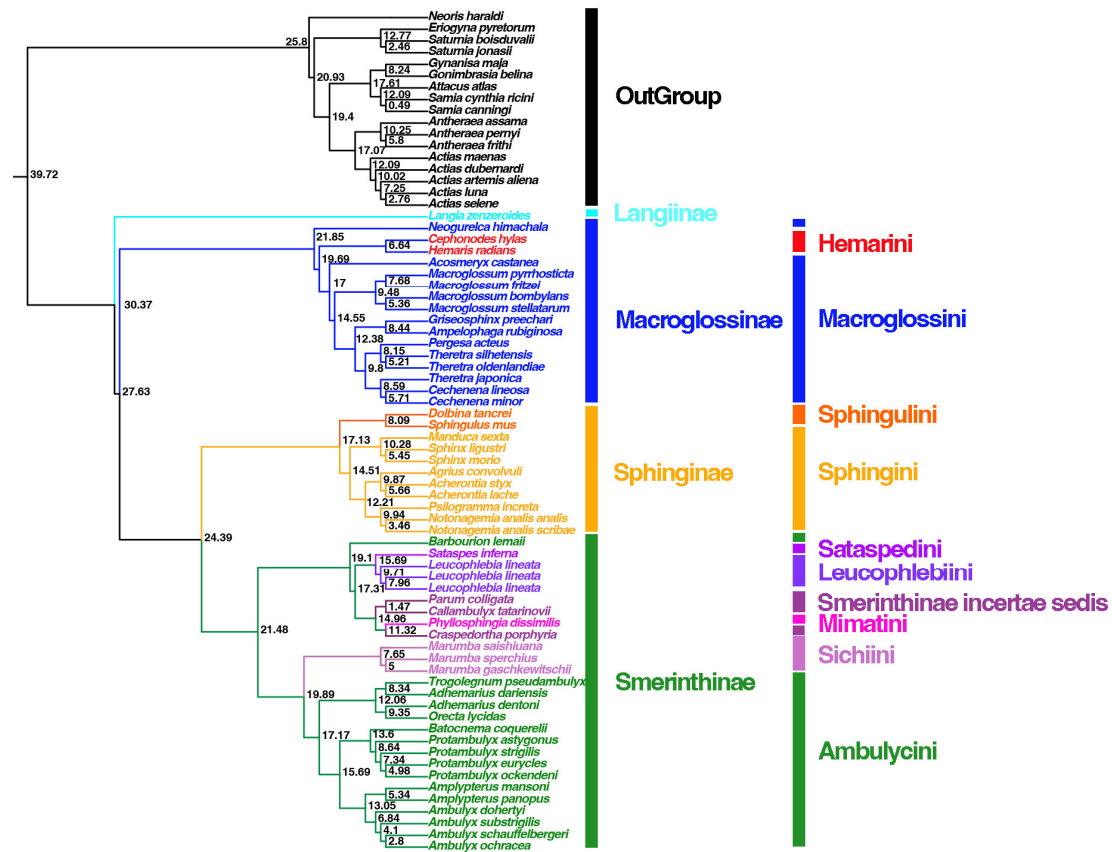

Figure S1. Phylogenetic tree inferred from Bayesian Inference (BI) method based on PCG12 dataset. Numbers on branches are posterior probability values.

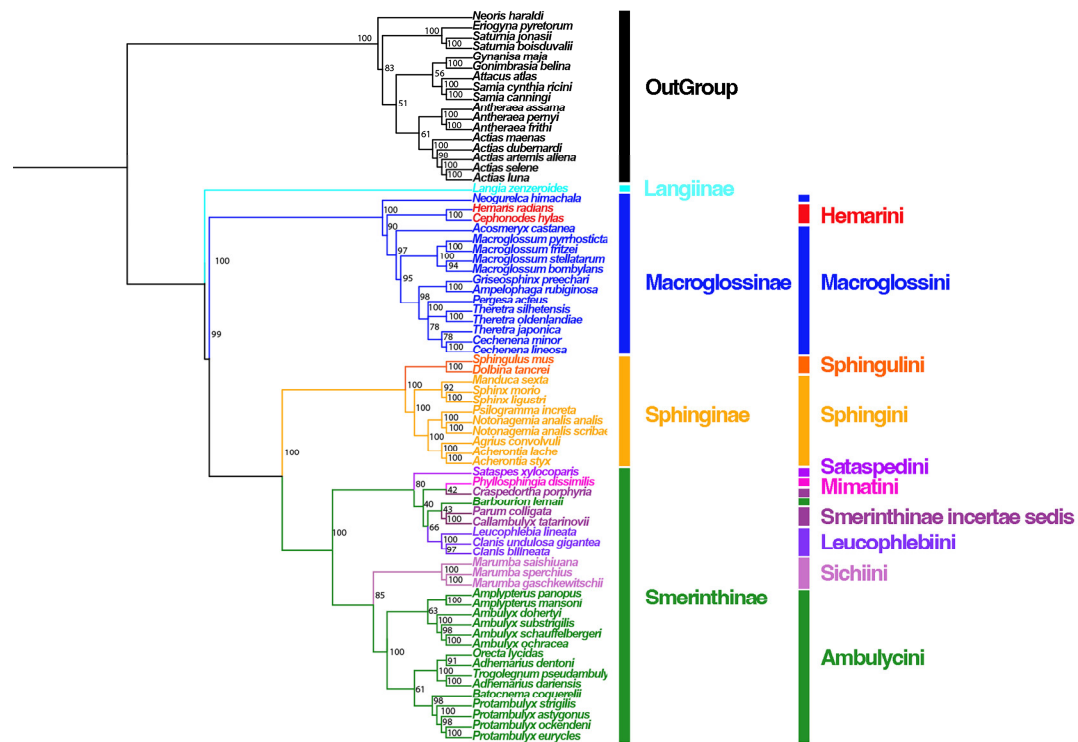

Figure S2. Phylogenetic tree inferred from Maximum Likelihood (ML) method based on PCG12 dataset. Numbers on branches are bootstrap support values.

Table S1. List of species investigated and their Genbank accession numbers. The GenBank numbers marked with an asterisk are the newly sequenced species in this paper.

| NO. | Family      | Taxa                            | GenBank Accession |
|-----|-------------|---------------------------------|-------------------|
| 1.  | Saturniidae | <i>Actias artemis aliena</i>    | KF927042          |
| 2.  |             | <i>Actias dubernardi</i>        | MW133617          |
| 3.  |             | <i>Actias luna</i>              | NC045899          |
| 4.  |             | <i>Actias maenas</i>            | MG836834          |
| 5.  |             | <i>Actias selene</i>            | JX186589          |
| 6.  |             | <i>Antheraea assama</i>         | NC030270          |
| 7.  |             | <i>Antheraea frithi</i>         | KJ740437          |
| 8.  |             | <i>Antheraea pernyi</i>         | MT890592          |
| 9.  |             | <i>Attacus atlas</i>            | NC021770          |
| 10. |             | <i>Eriogyna pyretorum</i>       | NC012727          |
| 11. |             | <i>Gonimbrasia belina</i>       | NC046032          |
| 12. |             | <i>Gynanisa maja</i>            | NC046033          |
| 13. |             | <i>Neoris haraldi</i>           | NC036765          |
| 14. |             | <i>Samia canningi</i>           | NC024270          |
| 15. |             | <i>Samia cynthia ricini</i>     | NC017869          |
| 16. |             | <i>Saturnia boisduvalii</i>     | MF034742          |
| 17. |             | <i>Saturnia jonasii</i>         | MF346379          |
| 18. | Sphingidae  | <i>Acherontia lachesis</i>      | OP219780*         |
| 19. |             | <i>Acherontia styx</i>          | OP219781*         |
| 20. |             | <i>Acosmerycoides harterti</i>  | MT712136          |
| 21. |             | <i>Acosmeryx castanea</i>       | OP219769*         |
| 22. |             | <i>Adhemarius dariensis</i>     | MK784108          |
| 23. |             | <i>Adhemarius dentoni</i>       | MK804148          |
| 24. |             | <i>Agrius convolvuli</i>        | OP219771*         |
| 25. |             | <i>Ambulyx dohertyi</i>         | MK804150          |
| 26. |             | <i>Ambulyx ochracea</i>         | MT712132          |
| 27. |             | <i>Ambulyx schauffelbergeri</i> | OP219770*         |
| 28. |             | <i>Ambulyx substrigilis</i>     | MK804151          |
| 29. |             | <i>Ampelophaga rubiginosa</i>   | MT712133          |
| 30. |             | <i>Amplipterus masoni</i>       | MK804152          |
| 31. |             | <i>Amplipterus panopus</i>      | MK804153          |

| NO. | Family | Taxa                                      | GenBank Accession |
|-----|--------|-------------------------------------------|-------------------|
| 32. |        | <i>Barbourion lemai</i>                   | MK804154          |
| 33. |        | <i>Batocnema coquerelii</i>               | MK804155          |
| 34. |        | <i>Callambulyx tatarinovii</i>            | OP219772*         |
| 35. |        | <i>Cechenena lineosa</i>                  | OP219773*         |
| 36. |        | <i>Cechenena minor</i>                    | OP219774*         |
| 37. |        | <i>Cephonodes hylas</i>                   | MT712134          |
| 38. |        | <i>Clanis biilineata</i>                  | MK804156          |
| 39. |        | <i>Clanis undulosa gigantea</i>           | MT712135          |
| 40. |        | <i>Craspedortha porphyria</i>             | OP219775*         |
| 41. |        | <i>Dalbina tancrei</i>                    | OP219782*         |
| 42. |        | <i>Hemaris radians</i>                    | MZ593599*         |
| 43. |        | <i>Langia zenzeroides</i>                 | MT922035          |
| 44. |        | <i>Leucophlebia lineata</i>               | MK804158          |
| 45. |        | <i>Macroglossum bombylans</i>             | OP210702*         |
| 46. |        | <i>Macroglossum fritzei</i>               | OP210703*         |
| 47. |        | <i>Macroglossum pyrrhosticta</i>          | OP210704*         |
| 48. |        | <i>Macroglossum stellatarum</i>           | MG747645          |
| 49. |        | <i>Manduca sexta</i>                      | EU286785          |
| 50. |        | <i>Marumba gaschkewitschii</i>            | MT712137          |
| 51. |        | <i>Marumba saishiwana</i>                 | OP219776*         |
| 52. |        | <i>Marumba sperchius</i>                  | MT712138          |
| 53. |        | <i>Neogurelca himachala</i>               | OP210705*         |
| 54. |        | <i>Notonagemia analis analis</i>          | MT712143          |
| 55. |        | <i>Notonagemia analis scribea</i>         | KU934302          |
| 56. |        | <i>Orecta Lycidas</i>                     | MK804159          |
| 57. |        | <i>Parum colligata</i>                    | MG888667          |
| 58. |        | <i>Pergesa acteus</i>                     | OP219777*         |
| 59. |        | <i>Phyllosphingia dissimilis sinensis</i> | OP219778*         |
| 60. |        | <i>Protambulyx astygonus</i>              | NC046723          |
| 61. |        | <i>Protambulyx eurycles</i>               | MK804161          |
| 62. |        | <i>Protambulyx ockendeni</i>              | NC046725          |
| 63. |        | <i>Protambulyx strigilis</i>              | MK804163          |
| 64. |        | <i>Psilogramma increta</i>                | MF974243          |

| NO. | Family | Taxa                            | GenBank Accession |
|-----|--------|---------------------------------|-------------------|
| 65. |        | <i>Sataspes xylocoparis</i>     | OP210706*         |
| 66. |        | <i>Sphingulus mus</i>           | OP219783*         |
| 67. |        | <i>Sphinx ligustri</i>          | OP219783*         |
| 68. |        | <i>Sphinx morio</i>             | KC470083          |
| 69. |        | <i>Theretra japonica</i>        | MG655620          |
| 70. |        | <i>Theretra oldenlandiae</i>    | MN885801          |
| 71. |        | <i>Theretra silhetensis</i>     | OP219783*         |
| 72. |        | <i>Trogolegnum pseudambulyx</i> | MK804164          |

Table S2. Nucleotide composition and skewing of eight diurnal hawkmoths.

|                                  | size  | A%    | C%    | G%   | T%    | AT-skew | GC-skew |
|----------------------------------|-------|-------|-------|------|-------|---------|---------|
| <i>Cephonodes hylas</i>          | 15410 | 41.00 | 11.70 | 7.60 | 39.70 | 0.0161  | -0.2124 |
| <i>Hemaris radians</i>           | 15436 | 40.70 | 11.90 | 7.70 | 39.70 | 0.0124  | -0.2143 |
| <i>Macroglossum bombylans</i>    | 15461 | 40.80 | 11.30 | 7.40 | 40.50 | 0.0037  | -0.2086 |
| <i>Macroglossum fritzei</i>      | 15336 | 40.10 | 11.80 | 7.60 | 40.50 | -0.0050 | -0.2165 |
| <i>Macroglossum pyrrhosticta</i> | 15348 | 40.00 | 12.10 | 7.60 | 40.30 | -0.0037 | -0.2284 |
| <i>Macroglossum stellatarum</i>  | 15290 | 40.70 | 11.20 | 7.60 | 40.50 | 0.0025  | -0.1915 |
| <i>Neogurelca himachala</i>      | 15264 | 39.90 | 11.60 | 7.60 | 40.90 | -0.0124 | -0.2083 |
| <i>Sataspes xylocoparis</i>      | 15201 | 41.80 | 12.00 | 7.50 | 38.70 | 0.0385  | -0.2307 |

Table S3. Mitogenomic organization of eight diurnal hawkmoths.

|                                                                      | Position            |                     | Size (bp)           | Intergenic nucleotides | Codon           |                 | Strand  |
|----------------------------------------------------------------------|---------------------|---------------------|---------------------|------------------------|-----------------|-----------------|---------|
|                                                                      | From                | To                  |                     |                        | Start           | Stop            |         |
| <i>M. pyrrhosticta/ M. stellatarum/ N. himachala/ S. xylocoparis</i> |                     |                     |                     |                        |                 |                 |         |
| <i>trnM</i>                                                          | 1/1/1/1             | 67/69/67/68         | 67/69/67/68         |                        |                 |                 | +/+/+/+ |
| <i>trnI</i>                                                          | 74/73/73/75         | 137/136/136/139     | 64/64/64/65         | 6/3/5/6                |                 |                 | +/+/+/+ |
| <i>trnQ</i>                                                          | 203/202/202/205     | 135/134/134/137     | 69/69/69/69         | -3/-3/-3/-3            |                 |                 | -/-/-/- |
| <i>nad2</i>                                                          | 258/260/255/262     | 1271/1273/1265/1275 | 1014/1014/1011/1014 | 54/57/52/56            | ATT/ATT/ATT/ATT | TAA/TAA/TAA/TAA | -/-/-/- |
| <i>trnW</i>                                                          | 1270/1273/1265/1281 | 1336/1343/1333/1347 | 67/71/69/67         | -2/-/-/5               |                 |                 | +/+/+/+ |
| <i>trnC</i>                                                          | 1392/1399/1391/1403 | 1329/1336/1326/1340 | 64/64/66/64         | -8/-8/-8/-8            |                 |                 | -/-/-/- |
| <i>trnY</i>                                                          | 1458/1468/1458/1470 | 1393/1404/1394/1404 | 66/65/65/67         | -4/2/-                 |                 |                 | +/+/+/+ |
| <i>coxI</i>                                                          | 1466/1475/1462/1478 | 2996/3005/2992/3008 | 1531/1531/1531/1531 | 7/6/3/7                | CGA/CGA/CGA/CGA | T/T/T/T         | -/-/-/- |
| <i>trnL2</i>                                                         | 2997/3006/2993/3009 | 3063/3072/3058/3075 | 67/67/66/67         | -5/-/-/-               |                 |                 | +/+/+/+ |
| <i>cox2</i>                                                          | 3064/3073/3059/3076 | 3745/3754/3740/3757 | 682/682/682/682     | -/-/-/-                | ATG/ATG/ATG/ATG | T/T/T/T         | -/-/-/- |
| <i>trnK</i>                                                          | 3746/3755/3741/3758 | 3816/3825/3811/3827 | 71/71/71/70         | -/-/-/-                |                 |                 | +/+/+/+ |
| <i>trnD</i>                                                          | 3830/3852/3839/3828 | 3895/3917/3903/3895 | 66/66/65/68         | 13/26/27/-             |                 |                 | +/+/+/+ |
| <i>atp8</i>                                                          | 3896/3918/3904/3896 | 4063/4082/4077/4054 | 168/165/174/159     | -/-/-/-                | ATA/ATC/ATA/ATG | TAA/TAA/TAA/TAA | -/-/-/- |
| <i>atp6</i>                                                          | 4057/4076/4071/4048 | 4734/4753/4748/4725 | 678/678/678/678     | -7/-7/-7/-7            | ATG/ATG/ATG/ATG | TAA/TAA/TAA/TAA | +/+/+/+ |
| <i>cox3</i>                                                          | 4734/4754/4748/4725 | 5525/5545/5539/5516 | 792/792/792/792     | -/-/-/-                | ATG/ATG/ATG/ATG | TAATAA/TAA/TAA  | -/-/-/- |
| <i>trnG</i>                                                          | 5528/5548/5542/5519 | 5593/5613/5607/5586 | 66/66/66/68         | 2/2/2/2                |                 |                 | +/+/+/+ |
| <i>nad3</i>                                                          | 5594/5614/5608/5587 | 5947/5967/5961/5940 | 354/354/354/354     | -/-/-/-                | ATT/ATT/ATT/ATT | TAG/TAG/TAG/TAA | -/-/-/- |
| <i>trnA</i>                                                          | 5946/5966/5960/5943 | 6016/6035/6024/6011 | 71/70/65/69         | -2/-2/-/2              |                 |                 | +/+/+/+ |
| <i>trnR</i>                                                          | 6017/6035/6025/6012 | 6081/6099/6088/6079 | 65/65/64/68         | -/-/-/-                |                 |                 | +/+/+/+ |
| <i>trnN</i>                                                          | 6090/6104/6091/6080 | 6155/6170/6156/6144 | 66/67/66/65         | 8/4/2/-                |                 |                 | +/+/+/+ |
| <i>trnS1</i>                                                         | 6151/6171/6162/6145 | 6219/6236/6227/6208 | 64/66/66/64         | -/-/5/-                |                 |                 | +/+/+/+ |
| <i>trnE</i>                                                          | 6235/6237/6239/6211 | 6299/6301/6304/6276 | 65/65/66/66         | 15/-/11/2              |                 |                 | +/+/+/+ |
| <i>trnF</i>                                                          | 6361/6365/6367/6343 | 6298/6300/6333/6275 | 64/66/65/69         | -2/-2/-2/-2            |                 |                 | +/+/+/+ |
| <i>nad5</i>                                                          | 8099/8103/8110/8078 | 6362/6366/6368/6344 | 1738/1738/1741/1735 | -/-/-/-                | ATT/ATT/ATT/ATT | T/T/T/T         | -/-/-/- |

|              |                         |                         |                     |             |                 |                 |         |
|--------------|-------------------------|-------------------------|---------------------|-------------|-----------------|-----------------|---------|
| <i>trnH</i>  | 8165/8168/8174/8145     | 8100/8104/8111/8079     | 66/65/64/64         | 15/-/-/-    |                 |                 | +/-/+/- |
| <i>nad4</i>  | 9501/9508/9511/9482     | 8167/8174/8174/8145     | 1335/1335/1338/1338 | 1/5/-/-     | ATG/ATG/ATG/ATG | TAA/TAA/TAA/TAA | -/-/-/- |
| <i>nad4l</i> | 9793/9806/9809/9778     | 9503/9516/9522/9488     | 291/291/288/291     | 1/7/10/5    | ATG/ATG/ATG/ATG | TAA/TAA/TAG/TAA | -/+/-/- |
| <i>trnT</i>  | 9798/9813/9815/9785     | 9862/9877/9880/9850     | 65/65/66/66         | 4/6/5/6     |                 |                 | +/-/+/- |
| <i>trnP</i>  | 9927/9971/9945/9914     | 9863/9877/9881/9850     | 65/65/65/65         | -/-/-/-     |                 |                 | -/-/-/- |
| <i>nad6</i>  | 9932/9945/9950/9922     | 10456/10472/10480/10449 | 525/528/531/528     | 4/3/4/7     | ATT/ATT/ATT/ATT | TAA/TAA/TAA/TAA | -/-/-/- |
| <i>cytb</i>  | 10456/10473/10480/10449 | 11604/11621/11634/11600 | 1149/1149/1155/1152 | -/-/-/-     | ATG/ATG/ATG/ATG | TAA/TAA/TAA/TAA | +/-/+/- |
| <i>trnS2</i> | 11603/11624/11634/11599 | 11669/11688/11700/11664 | 67/65/67/66         | -2/2/-/-2   |                 |                 | +/-/+/- |
| <i>nad1</i>  | 12624/12643/12659/12622 | 11689/11708/11723/11687 | 936/936/937/936     | 19/19/22/22 | ATG/ATG/ATG/ATG | TAA/TAA/TAA/TAG | -/-/-/- |
| <i>trnL1</i> | 12693/12712/12728/12690 | 12626/12645/12661/12624 | 68/68/68/67         | 1/1/1/1     |                 |                 | +/-/+/- |
| <i>rrnL</i>  | 14050/14000/14100/14039 | 12694/12721/12729/12691 | 1357/1280/1372/1349 | -/-/-/-     |                 |                 | -/-/-/- |
| <i>trnV</i>  | 14115/14130/14164/14103 | 14051/14066/14101/14040 | 65/65/64/64         | -/65/-/-    |                 |                 | +/-/+/- |
| <i>rrnS</i>  | 14922/14896/14941/14883 | 14116/14131/14165/14104 | 807/766/777/780     | -/-/-/-     |                 |                 | -/-/-/- |
| AT-rich      | 14923/14897/14942/14884 | 15348/15290/15264/15201 | 426/394/323/318     | -/-/-/-     |                 |                 | -/-/-/- |



Table S4. The tandem repeat units in the control region of the six diurnal hawkmoths.

|                                  | Number of Repeats | Indices | Period Size | Copy Number |
|----------------------------------|-------------------|---------|-------------|-------------|
| <i>Cephonodes hylas</i>          | 3                 | 130-260 | 46          | 2.9         |
|                                  |                   | 152-244 | 36          | 2.5         |
|                                  |                   | 197-270 | 16          | 4.5         |
|                                  |                   | 100-161 | 23          | 2.7         |
|                                  |                   | 102-157 | 19          | 3           |
| <i>Hemaris radians</i>           | 6                 | 99-244  | 10          | 14.1        |
|                                  |                   | 167-237 | 2           | 38.5        |
|                                  |                   | 172-237 | 16          | 4.3         |
|                                  |                   | 157-232 | 40          | 1.9         |
|                                  |                   | 43-76   | 2           | 17          |
| <i>Macroglossum bombylans</i>    | 5                 | 228-291 | 26          | 2.6         |
|                                  |                   | 230-303 | 18          | 4.1         |
|                                  |                   | 53-450  | 208         | 1.9         |
|                                  |                   | 384-456 | 25          | 3.1         |
|                                  |                   | 13-82   | 2           | 36.5        |
| <i>Macroglossum fritzei</i>      | 6                 | 20-106  | 8           | 9.3         |
|                                  |                   | 173-247 | 25          | 3           |
|                                  |                   | 192-301 | 9           | 12          |
|                                  |                   | 259-312 | 12          | 4.4         |
|                                  |                   | 311-361 | 2           | 26          |
| <i>Macroglossum pyrrhosticta</i> | 3                 | 28-65   | 1           | 38          |
|                                  |                   | 83-129  | 8           | 5.5         |
|                                  |                   | 286-334 | 20          | 2.3         |
|                                  |                   | 53-120  | 2           | 37          |
|                                  |                   | 53-103  | 18          | 2.9         |
| <i>Macroglossum stellatarum</i>  | 7                 | 54-130  | 26          | 2.9         |
|                                  |                   | 54-130  | 14          | 5.3         |
|                                  |                   | 53-137  | 28          | 3.1         |
|                                  |                   | 254-327 | 18          | 4.1         |
|                                  |                   | 233-353 | 28          | 4.3         |
